# Supplementary material
Source: PubMed Central journal article supplement (PMC2916335)
Supplement: supp_54_8_3121__1.pdf [file supp_54_8_3121__1.pdf]

**SUPPLEMENTARY TABLE S1.**

| <b>RegionID<sup>1</sup></b> | <b>LocID<sup>2</sup></b> | <b>DATE<sup>3</sup></b><br>(mm YYYY) | <b>Bolivian Repeat<sup>4</sup></b> | <b><i>dhfr</i> allele<sup>5</sup></b> | <b><i>dhps</i> allele<sup>6</sup></b> | <b>Resistance genotypes<sup>7</sup></b> | <b><i>mDHR</i><sup>8</sup></b> | <b><i>MAI</i><sup>9</sup></b> | <b><i>m0.8</i><sup>10</sup></b> | <b><i>m4.3</i><sup>11</sup></b> | <b><i>PfPK2</i><sup>12</sup></b> | <b><i>Polyα</i><sup>13</sup></b> | <b><i>msFR_Hap</i><sup>14</sup></b> | <b><i>msPS_Hap</i><sup>15</sup></b> | <b><i>msUnlinked</i><sup>16</sup></b> | <b><i>msFRPS</i><sup>17</sup></b> | <b><i>msFR_Unlinked</i><sup>18</sup></b> | <b><i>msPS-unlinked</i><sup>19</sup></b> | <b><i>msFRPSUnlinked</i><sup>20</sup></b> |  |
|-----------------------------|--------------------------|--------------------------------------|------------------------------------|---------------------------------------|---------------------------------------|-----------------------------------------|--------------------------------|-------------------------------|---------------------------------|---------------------------------|----------------------------------|----------------------------------|-------------------------------------|-------------------------------------|---------------------------------------|-----------------------------------|------------------------------------------|------------------------------------------|-------------------------------------------|--|
| <b>Amazonas1</b>            | Amazonas1                | 05/2005                              | NO                                 | ICNL                                  | GKG                                   | ICNL/GKG                                |                                |                               | 119                             |                                 | 171                              |                                  |                                     |                                     |                                       |                                   |                                          |                                          |                                           |  |
| Amazonas2                   | Amazonas2                | 09/2005                              |                                    | NCNI                                  | AKA                                   | NCNI/AKA                                | 98                             |                               | 115                             | 104                             |                                  |                                  |                                     | 19                                  |                                       |                                   |                                          |                                          |                                           |  |
| Amazonas3                   | Amazonas3                | 06/2006                              |                                    | ICNI                                  | GEG                                   | ICNI/GEG                                | 98                             | 201                           | 115                             | 104                             | 171                              | 183                              | 4                                   | 19                                  | 46                                    | 60                                | 86                                       | 113                                      | 163                                       |  |
| Amazonas4                   | Amazonas4                | 05/2005                              |                                    | ICNL                                  | GKG                                   | ICNL/GKG                                | 96                             | 199                           | 113                             | 102                             | 168                              |                                  | 1                                   | 17                                  |                                       | 52                                |                                          |                                          |                                           |  |
| <b>Amazonas5</b>            | Amazonas5                | 05/2006                              | NO                                 | RICNI                                 | GEG                                   | ICNI/GEG                                | 98                             | 201                           | 115                             | 104                             | 171                              | 183                              | 4                                   | 19                                  | 46                                    | 60                                | 86                                       | 113                                      | 163                                       |  |
| Amazonas6                   | Amazonas6                | 12/2005                              |                                    | NCNI                                  | AKA                                   | NCNI/AKA                                | 98                             |                               | 115                             | 104                             | 162                              | 165                              |                                     | 19                                  | 37                                    |                                   |                                          |                                          | 109                                       |  |
| <b>Amazonas7</b>            | Leticia7                 | 05/2006                              | NO                                 | RICNI                                 | GEG                                   | ICNI/GEG                                | 98                             | 201                           | 115                             | 104                             | 171                              | 183                              | 4                                   | 19                                  | 46                                    | 60                                | 86                                       | 113                                      | 163                                       |  |
| Amazonas8                   | Tarapaca8                | 08/2007                              |                                    | ICNI                                  | GEG                                   | ICNI/GEG                                | 98                             | 201                           | 115                             | 104                             | 171                              | 183                              | 4                                   | 19                                  | 46                                    | 60                                | 86                                       | 113                                      | 163                                       |  |
| Amazonas9                   | Leticia9                 | 10/2006                              |                                    | ICNI                                  | GEG                                   | ICNI/GEG                                | 98                             | 201                           | 115                             | 104                             | 171                              | 183                              | 4                                   | 19                                  | 46                                    | 60                                | 86                                       | 113                                      | 163                                       |  |
| Amazonas10                  | Leticia10                | 05/2006                              |                                    | ICNI                                  | GEG                                   | ICNI/GEG                                | 98                             | 201                           | 115                             | 104                             | 171                              | 183                              | 4                                   | 19                                  | 46                                    | 60                                | 86                                       | 113                                      | 163                                       |  |
| Amazonas11                  | Tarapaca11               | 12/2006                              |                                    | ICNI                                  | GEG                                   | ICNI/GEG                                | 98                             | 201                           | 115                             | 104                             | 171                              | 183                              | 4                                   | 19                                  | 46                                    | 60                                | 86                                       | 113                                      | 163                                       |  |
| Amazonas12                  | Pedreira12               | 12/2006                              |                                    | ICNI                                  | GKA                                   | ICNI/GKA                                | 98                             | 201                           | 123                             | 110                             | 162                              | 159                              | 4                                   | 27                                  | 35                                    | 66                                | 81                                       | 127                                      | 151                                       |  |
| Amazonas13                  | Leticia13                | 08/2007                              |                                    | ICNI                                  | GEG                                   | ICNI/GEG                                | 98                             | 201                           | 115                             | 104                             | 171                              |                                  | 4                                   | 19                                  |                                       | 60                                |                                          |                                          |                                           |  |
| Amazonas14                  | Leticia14                | 08/2006                              |                                    | ICNI                                  | GEG                                   | ICNI/GEG                                | 98                             | 201                           | 115                             | 104                             | 171                              | 183                              | 4                                   | 19                                  | 46                                    | 60                                | 86                                       | 113                                      | 163                                       |  |
| Amazonas15                  | Leticia15                | 06/2006                              |                                    | NCNI                                  | AKA                                   | NCNI/AKA                                | 125                            | 221                           | 115                             | 104                             | 171                              | 165                              | 12                                  | 19                                  | 45                                    | 77                                | 101                                      | 112                                      | 162                                       |  |
| Amazonas16                  | Leticia16                | 05/2006                              |                                    | ICNI                                  | GEG                                   | ICNI/GEG                                | 98                             | 201                           | 115                             | 104                             | 171                              | 183                              | 4                                   | 19                                  | 46                                    | 60                                | 86                                       | 113                                      | 163                                       |  |
| Amazonas17                  | Leticia17                | 07/2006                              |                                    | ICNI                                  | GEG                                   | ICNI/GEG                                | 98                             | 201                           | 115                             | 104                             | 171                              | 183                              | 4                                   | 19                                  | 46                                    | 60                                | 86                                       | 113                                      | 163                                       |  |
| Amazonas18                  | Leticia18                | 06/2006                              |                                    | ICNI                                  | GEG                                   | ICNI/GEG                                | 98                             | 201                           | 115                             | 104                             | 171                              | 183                              | 4                                   | 19                                  | 46                                    | 60                                | 86                                       | 113                                      | 163                                       |  |
| Amazonas19                  | Leticia19                | 08/2006                              |                                    | ICNI                                  | GEG                                   | ICNI/GEG                                | 98                             | 201                           | 115                             | 104                             | 171                              | 183                              | 4                                   | 19                                  | 46                                    | 60                                | 86                                       | 113                                      | 163                                       |  |
| <b>Amazonas20</b>           | Leticia20                | 06/2006                              | NO                                 | ICNI                                  | GEG                                   | ICNI/GEG                                | 98                             | 201                           | 115                             | 104                             | 171                              | 183                              | 4                                   | 19                                  | 46                                    | 60                                | 86                                       | 113                                      | 163                                       |  |
| <b>Amazonas21</b>           | Pedreira21               | 11/2006                              | NO                                 | ICNI                                  | GKA                                   | ICNI/GKA                                | 98                             | 201                           | 119                             | 110                             | 162                              | 159                              | 4                                   | 21                                  | 35                                    | 61                                | 81                                       | 114                                      | 148                                       |  |
| Amazonas22                  | Tarapaca22               | 08/2007                              |                                    | NCNI                                  | AKA                                   | NCNI/AKA                                | 98                             | 221                           | 115                             | 104                             | 162                              | 165                              | 6                                   | 19                                  | 37                                    | 70                                | 92                                       | 109                                      | 156                                       |  |
| Amazonas23                  | Tarapaca23               | 09/2007                              |                                    | NCNI                                  | AKA                                   | NCNI/AKA                                |                                | 221                           | 115                             | 104                             | 162                              | 165                              |                                     | 19                                  | 37                                    |                                   |                                          | 109                                      |                                           |  |
| Amazonas24                  | Tarapaca24               | 09/2007                              |                                    | NCNI                                  | AKA                                   | NCNI/AKA                                | 125                            | 221                           | 115                             | 104                             | 162                              | 165                              | 12                                  | 19                                  | 37                                    | 77                                | 100                                      | 109                                      | 157                                       |  |
| <b>Amazonas25</b>           | Tarapaca25               | 08/2007                              | NO                                 | NCNI                                  | AKA                                   | NCNI/AKA                                |                                | 221                           | 115                             | 104                             | 162                              | 165                              |                                     | 19                                  | 37                                    |                                   |                                          | 109                                      |                                           |  |
| <b>Amazonas26</b>           | Tarapaca26               | 08/2007                              | NO                                 | NCNI                                  | AKA                                   | NCNI/AKA                                | 125                            | 221                           | 115                             | 104                             | 162                              | 165                              | 12                                  | 19                                  | 37                                    | 77                                | 100                                      | 109                                      | 157                                       |  |
| <b>Amazonas27</b>           | Tarapaca27               | 08/2007                              | NO                                 | NCNI                                  | AKA                                   | NCNI/AKA                                | 125                            | 221                           | 115                             | 104                             | 162                              | 165                              | 12                                  | 19                                  | 37                                    | 77                                | 100                                      | 109                                      | 157                                       |  |
| Amazonas28                  | Pedreira28               | 11/2007                              |                                    | ICNI                                  | GKA                                   | ICNI/GKA                                |                                | 201                           | 123                             | 110                             | 162                              | 159                              |                                     | 27                                  | 35                                    |                                   |                                          | 127                                      |                                           |  |
| Amazonas29                  | Leticia29                | 05/2005                              |                                    | ICNI                                  | GEG                                   | ICNI/GEG                                | 98                             | 201                           | 115                             | 104                             | 171                              | 183                              | 4                                   | 19                                  | 46                                    | 60                                | 86                                       | 113                                      | 163                                       |  |
| Amazonas30                  | Leticia30                | 04/2006                              |                                    | ICNI                                  | GEG                                   | ICNI/GEG                                | 98                             | 201                           | 115                             | 104                             | 171                              | 183                              | 4                                   | 19                                  | 46                                    | 60                                | 86                                       | 113                                      | 163                                       |  |
| Amazonas31                  | Leticia31                | 12/2006                              |                                    | ICNI                                  | AKA                                   | ICNI/AKA                                | 125                            | 221                           | 115                             | 104                             | 171                              | 165                              | 12                                  | 19                                  | 45                                    | 77                                | 101                                      | 112                                      | 162                                       |  |
| Orinoco32                   | Vista                    | 12/2005                              |                                    |                                       |                                       |                                         | 98                             | 199                           | 115                             | 104                             | 171                              |                                  | 3                                   | 19                                  |                                       | 54                                |                                          |                                          |                                           |  |
|                             | Hermosa32                |                                      |                                    |                                       |                                       |                                         |                                |                               |                                 |                                 |                                  |                                  |                                     |                                     |                                       |                                   |                                          |                                          |                                           |  |
| Orinoco33                   | Vista                    | 10/2005                              |                                    | ICNI                                  | GKA                                   | ICNI/GKA                                |                                | 199                           | 123                             | 104                             | 171                              | 183                              |                                     | 24                                  | 46                                    |                                   |                                          | 121                                      |                                           |  |
|                             | Hermosa33                |                                      |                                    |                                       |                                       |                                         |                                |                               |                                 |                                 |                                  |                                  |                                     |                                     |                                       |                                   |                                          |                                          |                                           |  |
| Orinoco34                   | Meta34                   | 12/2005                              |                                    | ICNI                                  | GKG                                   | ICNI/GKG                                | 98                             | 201                           | 115                             | 104                             | 171                              |                                  | 4                                   | 19                                  |                                       | 60                                |                                          |                                          |                                           |  |



| RegionID <sup>1</sup> | LocID <sup>2</sup> | DATE <sup>3</sup><br>(mm YYYY) | Bolivian Repeat <sup>4</sup> | <i>dhfr</i> allele <sup>5</sup> | <i>dhps</i> allele <sup>6</sup> | Resistance genotypes <sup>7</sup> | <i>mDHFR</i> <sup>8</sup> | <i>MAI</i> <sup>9</sup> | <i>m0.8</i> <sup>10</sup> | <i>m4.3</i> <sup>11</sup> | <i>PfPK2</i> <sup>12</sup> | <i>Polyα</i> <sup>13</sup> | <i>msFR_Hap</i> <sup>14</sup> | <i>msPS_Hap</i> <sup>15</sup> | <i>msUnlinked</i> <sup>16</sup> | <i>msFRPS</i> <sup>17</sup> | <i>msFR_Unlinked</i> <sup>18</sup> | <i>msPS-unlinked</i> <sup>19</sup> | <i>msFRPSUnlinked</i> <sup>20</sup> |
|-----------------------|--------------------|--------------------------------|------------------------------|---------------------------------|---------------------------------|-----------------------------------|---------------------------|-------------------------|---------------------------|---------------------------|----------------------------|----------------------------|-------------------------------|-------------------------------|---------------------------------|-----------------------------|------------------------------------|------------------------------------|-------------------------------------|
| Orinoco58             | Meta58             | 06/2006                        |                              | ICNI                            | GKA                             | ICNI/GKA                          |                           | 201                     | 115                       |                           | 165                        | 159                        |                               |                               | 38                              |                             |                                    |                                    |                                     |
| Orinoco59             | Agualinda59        | 12/2005                        |                              | NCNI                            |                                 |                                   | 102                       |                         |                           | 104                       | 165                        | 183                        |                               |                               | 39                              |                             |                                    |                                    |                                     |
| Orinoco60             | Meta60             | 01/2006                        |                              | ICNI                            | GKA                             | ICNI/GKA                          | 98                        | 203                     |                           | 104                       | 162                        | 159                        | 5                             |                               | 35                              |                             | 91                                 |                                    |                                     |
| <b>Orinoco61</b>      | Meta61             | 07/2006                        | NO                           | ICNI                            | GKG                             | ICNI/GKG                          | 98                        | 201                     | 115                       | 104                       | 171                        | 183                        | 4                             | 19                            | 46                              | 60                          | 86                                 | 113                                | 163                                 |
| Orinoco62             | Meta62             | 12/2005                        |                              | ICNI                            | GKA                             | ICNI/GKA                          | 104                       |                         | 115                       | 104                       | 174                        |                            |                               | 19                            |                                 |                             |                                    |                                    |                                     |
| Orinoco63             | Guaviare63         | 11/2005                        |                              | ICNI                            | GKA                             | ICNI/GKA                          | 98                        | 201                     | 123                       | 110                       | 174                        | 159                        | 4                             | 27                            | 49                              | 66                          | 89                                 | 129                                | 174                                 |
| <b>Orinoco64</b>      | Guaviare64         | 04/2006                        | NO                           | NCNI                            | GKA                             | NCNI/GKA                          | 98                        | 201                     | 121                       | 110                       | 162                        | 162                        | 4                             | 23                            | 36                              | 63                          | 82                                 | 118                                | 154                                 |
| Amazonas65            | unknown65          | 06/1999                        |                              |                                 | GKG                             |                                   | 102                       | 221                     | 115                       | 104                       | 171                        | 183                        | 8                             | 19                            | 46                              | 72                          | 95                                 | 113                                | 165                                 |
| Amazonas66            | unknown66          | 06/1999                        |                              | ICNL                            | GKG                             | ICNL/GKG                          |                           |                         |                           |                           |                            |                            |                               |                               |                                 |                             |                                    |                                    |                                     |
| Amazonas67            | unknown67          | 07/1999                        |                              | ICNL                            | GEG                             | ICNL/GEG                          | 102                       | 221                     | 115                       | 104                       | 165                        | 183                        | 8                             | 19                            | 39                              | 72                          | 94                                 | 110                                | 159                                 |
| <b>Amazonas68</b>     | unknown68          | 08/1999                        | YES                          | ICNL                            | GEG                             | ICNL/GEG                          | 102                       | 221                     | 115                       | 104                       | 165                        | 183                        | 8                             | 19                            | 39                              | 72                          | 94                                 | 110                                | 159                                 |
| <b>Amazonas69</b>     | Tarapaca69         | 06/2003                        | YES                          | ICNL                            | GEG                             | ICNL/GEG                          | 102                       | 221                     | 115                       | 104                       | 165                        | 183                        | 8                             | 19                            | 39                              | 72                          | 94                                 | 110                                | 159                                 |
| <b>Amazonas70</b>     | Tarapaca70         | 06/2003                        | YES                          | ICNL                            | GEG                             | ICNL/GEG                          | 102                       |                         | 115                       | 104                       | 165                        | 183                        |                               | 19                            | 39                              |                             |                                    | 110                                |                                     |
| <b>Amazonas71</b>     | Tarapaca71         | 06/2003                        | YES                          | ICNL                            | GEG                             | ICNL/GEG                          | 102                       | 221                     | 115                       | 104                       | 165                        | 183                        | 8                             | 19                            | 39                              | 72                          | 94                                 | 110                                | 159                                 |
| <b>Amazonas72</b>     | Tarapaca72         | 11/2002                        | YES                          | ICNL                            | GKA                             | ICNL/GKA                          | 102                       | 221                     | 115                       | 104                       | 171                        | 183                        | 8                             | 19                            | 46                              | 72                          | 95                                 | 113                                | 165                                 |
| <b>Amazonas73</b>     | Tarapaca73         | 10/2002                        | YES                          | ICNL                            | GKG                             | ICNL/GKG                          | 102                       | 221                     | 115                       | 104                       | 171                        | 183                        | 8                             | 19                            | 46                              | 72                          | 95                                 | 113                                | 165                                 |
| <b>Amazonas74</b>     | Tarapaca74         | 11/2002                        | YES                          | ICNL                            | GKG                             | ICNL/GKG                          | 100                       | 221                     | 115                       | 104                       | 171                        | 183                        | 7                             | 19                            | 46                              | 71                          | 93                                 | 113                                | 164                                 |
| <b>Amazonas75</b>     | Tarapaca75         | 06/2003                        | YES                          | ICNL                            | GEG                             | ICNL/GEG                          | 102                       | 221                     | 115                       | 104                       | 165                        | 183                        | 8                             | 19                            | 39                              | 72                          | 94                                 | 110                                | 159                                 |
| Amazonas76            | Tarapaca76         | 04/2003                        |                              | ICNL                            | GEG                             | ICNL/GEG                          | 102                       | 221                     | 115                       | 104                       | 165                        | 183                        | 8                             | 19                            | 39                              | 72                          | 94                                 | 110                                | 159                                 |
| Orinoco77             | Guaviare77         | uncertain                      |                              | ICNI                            | GKA                             | ICNI/GKA                          | 98                        | 201                     | 123                       | 110                       | 162                        | 159                        | 4                             | 27                            | 35                              | 66                          | 81                                 | 127                                | 151                                 |
| Orinoco78             | Guaviare78         | uncertain                      |                              |                                 | GKA                             |                                   | 98                        | 201                     | 111                       | 108                       | 162                        | 159                        | 4                             | 15                            | 35                              | 57                          | 81                                 | 104                                | 145                                 |
| Orinoco79             | Guaviare79         | uncertain                      |                              | ICNI                            | GKA                             | ICNI/GKA                          | 98                        | 201                     | 111                       | 108                       | 162                        | 159                        | 4                             | 15                            | 35                              | 57                          | 81                                 | 104                                | 145                                 |
| Orinoco80             | Guaviare80         | uncertain                      |                              | ICNI                            |                                 |                                   | 98                        |                         | 123                       | 110                       | 162                        |                            |                               | 27                            |                                 |                             |                                    |                                    |                                     |
| Orinoco81             | Guaviare81         | uncertain                      |                              | ICNI                            | GKA                             | ICNI/GKA                          | 98                        | 201                     | 111                       | 108                       | 162                        | 159                        | 4                             | 15                            | 35                              | 57                          | 81                                 | 104                                | 145                                 |
| Orinoco82             | Guaviare82         | uncertain                      |                              | ICNI                            | GKA                             | ICNI/GKA                          | 98                        | 201                     | 111                       | 108                       | 162                        | 159                        | 4                             | 15                            | 35                              | 57                          | 81                                 | 104                                | 145                                 |
| Orinoco83             | Guaviare83         | uncertain                      |                              | ICNI                            | AKA                             | ICNI/AKA                          | 98                        | 201                     | 133                       | 106                       | 174                        | 156                        | 4                             | 30                            | 48                              | 69                          | 88                                 | 139                                | 172                                 |
| Orinoco84             | Guaviare84         | uncertain                      |                              | ICNI                            | GKA                             | ICNI/GKA                          | 98                        | 201                     | 123                       | 110                       | 162                        | 159                        | 4                             | 27                            | 35                              | 66                          | 81                                 | 127                                | 151                                 |
| Orinoco85             | Guaviare85         | uncertain                      |                              | ICNI                            | GKA                             | ICNI/GKA                          | 98                        | 201                     | 111                       | 108                       | 162                        | 159                        | 4                             | 15                            | 35                              | 57                          | 81                                 | 104                                | 145                                 |
| Orinoco86             | Guaviare86         | uncertain                      |                              | ICNI                            | GKA                             | ICNI/GKA                          | 98                        | 201                     | 111                       | 108                       | 162                        | 159                        | 4                             | 15                            | 35                              | 57                          | 81                                 | 104                                | 145                                 |
| SWP87                 | Tumaco87           | 10/2003                        |                              | NCSI                            | AKA                             | NCSI/AKA                          | 102                       | 224                     | 127                       | 108                       | 174                        | 180                        | 9                             | 28                            | 51                              | 73                          | 97                                 | 134                                | 178                                 |
| SWP88                 | Tumaco88           | 10/2003                        |                              | NCNI                            | AKA                             | NCNI/AKA                          | 98                        | 201                     | 123                       | 106                       | 159                        | 149                        | 4                             | 25                            | 31                              | 64                          | 79                                 | 122                                | 140                                 |
| SWP89                 | Tumaco89           | 09/2003                        |                              | NCSI                            | AKA                             | NCSI/AKA                          | 102                       | 224                     | 127                       | 108                       | 168                        | 149                        | 9                             | 28                            | 40                              | 73                          | 96                                 | 130                                | 160                                 |
| SWP90                 | Tumaco90           | 10/2003                        |                              | NCSI                            | AKA                             | NCSI/AKA                          | 102                       | 224                     | 127                       | 108                       | 174                        | 180                        | 9                             | 28                            | 51                              | 73                          | 97                                 | 134                                | 178                                 |
| SWP91                 | Tumaco91           | 09/2003                        |                              | NCSI                            | AKA                             | NCSI/AKA                          | 102                       | 228                     | 127                       | 108                       | 174                        | 149                        | 10                            | 28                            | 47                              | 75                          | 99                                 | 132                                | 170                                 |
| SWP92                 | Tumaco92           | 08/2003                        |                              | NCSI                            | AKA                             | NCSI/AKA                          | 102                       | 228                     | 127                       | 108                       | 174                        | 149                        | 10                            | 28                            | 47                              | 75                          | 99                                 | 132                                | 170                                 |
| SWP93                 | Tumaco93           | 07/2006                        |                              | NCSI                            | AKA                             | NCSI/AKA                          | 102                       | 224                     | 127                       | 108                       | 168                        | 149                        | 9                             | 28                            | 40                              | 73                          | 96                                 | 130                                | 160                                 |
| SWP94                 | Tumaco94           | 05/2006                        |                              | NCNI                            | AKA                             | NCNI/AKA                          | 98                        | 201                     | 121                       | 110                       | 174                        | 174                        | 4                             | 23                            | 50                              | 63                          | 90                                 | 120                                | 176                                 |
| SWP95                 | Tumaco95           | 10/2006                        |                              | NCSI                            | AKA                             | NCSI/AKA                          | 102                       | 224                     | 127                       | 108                       | 174                        | 180                        | 9                             | 28                            | 51                              | 73                          | 97                                 | 134                                | 178                                 |

| RegionID <sup>1</sup> | LocID <sup>2</sup> | DATE <sup>3</sup><br>(mm YYYY) | Bolivian Repeat <sup>4</sup> | <i>dhfr</i> allele <sup>5</sup> | <i>dhps</i> allele <sup>6</sup> | Resistance genotypes <sup>7</sup> | <i>mDHR8</i> | <i>MAI</i> <sup>9</sup> | <i>m0.8</i> <sup>10</sup> | <i>m4.3</i> <sup>11</sup> | <i>PfPK2</i> <sup>12</sup> | <i>Polyα</i> <sup>13</sup> | <i>msFR_Hap</i> <sup>14</sup> | <i>msPS_Hap</i> <sup>15</sup> | <i>msUnlinked</i> <sup>16</sup> | <i>msFRPS</i> <sup>17</sup> | <i>msFR_Unlinked</i> <sup>18</sup> | <i>msPS-unlinked</i> <sup>19</sup> | <i>msFRPSUnlinked</i> <sup>20</sup> |
|-----------------------|--------------------|--------------------------------|------------------------------|---------------------------------|---------------------------------|-----------------------------------|--------------|-------------------------|---------------------------|---------------------------|----------------------------|----------------------------|-------------------------------|-------------------------------|---------------------------------|-----------------------------|------------------------------------|------------------------------------|-------------------------------------|
| SWP96                 | Tumaco96           | 06/2006                        |                              | NCSI                            | AKA                             | NCSI/AKA                          | 102          | 224                     |                           | 108                       | 168                        | 149                        | 9                             |                               | 40                              |                             | 96                                 |                                    |                                     |
| SWP97                 | Tumaco97           | 10/2003                        |                              | NCNI                            | AKA                             | NCNI/AKA                          | 98           | 201                     | 123                       | 108                       | 162                        | 159                        | 4                             | 26                            | 35                              | 65                          | 81                                 | 126                                | 150                                 |
| SWP98                 | Tumaco98           | 10/2003                        |                              | NCSI                            | AKA                             | NCSI/AKA                          | 102          | 228                     | 123                       | 106                       | 159                        | 149                        | 10                            | 25                            | 31                              | 74                          | 98                                 | 122                                | 141                                 |
| SWP99                 | Tumaco99           | 08/2003                        |                              | NCSI                            | AKA                             | NCSI/AKA                          | 102          | 228                     | 127                       | 108                       | 174                        | 149                        | 10                            | 28                            | 47                              | 75                          | 99                                 | 132                                | 170                                 |
| <b>SWP100</b>         | Tumaco100          | 10/2003                        | NO                           | NCNI                            | AKA                             | NCNI/AKA                          | 98           | 201                     | 121                       | 110                       | 174                        | 174                        | 4                             | 23                            | 50                              | 63                          | 90                                 | 120                                | 176                                 |
| SWP101                | Tumaco101          | 10/2003                        |                              | NCSI                            | AKA                             | NCSI/AKA                          | 102          |                         | 127                       | 108                       | 168                        | 149                        |                               | 28                            | 40                              |                             |                                    | 130                                |                                     |
| <b>SWP102</b>         | Tumaco102          | 10/2003                        | NO                           | NCSI                            | AKA                             | NCSI/AKA                          | 102          | 224                     | 127                       | 108                       | 174                        | 180                        | 9                             | 28                            | 51                              | 73                          | 97                                 | 134                                | 178                                 |
| SWP103                | Tumaco103          | 08/2003                        |                              | ICNI                            | AKA                             | ICNI/AKA                          | 98           | 201                     | 123                       | 106                       | 174                        | 149                        | 4                             | 25                            | 47                              | 64                          | 87                                 | 124                                | 167                                 |
| SWP104                | Tumaco104          | 10/2003                        |                              | NCNI                            | AKA                             | NCNI/AKA                          | 98           |                         | 121                       | 110                       | 174                        | 174                        |                               | 23                            | 50                              |                             |                                    | 120                                |                                     |
| SWP105                | Tumaco105          | 10/2003                        |                              | NCSI                            | AKA                             | NCSI/AKA                          | 102          | 224                     | 127                       | 108                       | 174                        | 180                        | 9                             | 28                            | 51                              | 73                          | 97                                 | 134                                | 178                                 |
| SWP106                | Tumaco106          | 06/2003                        |                              | NCSI                            | AKA                             | NCSI/AKA                          | 102          | 224                     | 127                       | 108                       | 168                        | 149                        | 9                             | 28                            | 40                              | 73                          | 96                                 | 130                                | 160                                 |
| SWP107                | Tumaco107          | 05/2006                        |                              | NCSI                            | AKA                             | NCSI/AKA                          |              | 228                     | 127                       | 108                       | 171                        | 149                        |                               | 28                            | 43                              |                             |                                    | 131                                |                                     |
| SWP108                | Tumaco108          | 07/2006                        |                              | NCSI                            | AKA                             | NCSI/AKA                          |              | 224                     | 127                       | 108                       | 174                        | 180                        |                               | 28                            | 51                              |                             |                                    | 134                                |                                     |
| SWP109                | Tumaco109          | 08/2006                        |                              | NCNI                            | AKA                             | NCNI/AKA                          | 98           | 201                     | 127                       | 108                       | 174                        | 174                        | 4                             | 28                            | 50                              | 67                          | 90                                 | 133                                | 177                                 |
| SWP110                | Tumaco110          | 05/2006                        |                              | NCSI                            | AKA                             | NCSI/AKA                          | 102          | 228                     | 127                       | 108                       | 174                        | 149                        | 10                            | 28                            | 47                              | 75                          | 99                                 | 132                                | 170                                 |
| SWP111                | Tumaco111          | 10/2003                        |                              | NCNI                            | AKA                             | NCNI/AKA                          | 98           | 201                     | 129                       | 106                       | 174                        | 149                        | 4                             | 29                            | 47                              | 68                          | 87                                 | 137                                | 169                                 |
| SWP112                | Tumaco112          | 10/2003                        |                              | NCNI                            | AKA                             | NCNI/AKA                          | 98           | 201                     | 129                       | 106                       | 174                        | 149                        | 4                             | 29                            | 47                              | 68                          | 87                                 | 137                                | 169                                 |
| SWP113                | Tumaco113          | 10/2003                        |                              | NCSI                            | AKA                             | NCSI/AKA                          | 102          | 224                     | 127                       | 108                       |                            | 149                        | 9                             | 28                            |                                 | 73                          |                                    |                                    |                                     |
| SWP114                | Tumaco114          | 08/2003                        |                              | ICNI                            | AKA                             | ICNI/AKA                          | 98           | 201                     | 123                       | 106                       | 174                        | 149                        | 4                             | 25                            | 47                              | 64                          | 87                                 | 124                                | 167                                 |
| SWP115                | Tumaco115          | 10/2003                        |                              | NCSI                            | AKA                             | NCSI/AKA                          | 102          | 228                     | 123                       | 106                       | 159                        | 149                        | 10                            | 25                            | 31                              | 74                          | 98                                 | 122                                | 141                                 |
| SWP116                | Tumaco116          | 12/2006                        |                              | NCNI                            | AKA                             | NCNI/AKA                          | 98           | 201                     | 121                       | 110                       | 174                        | 174                        | 4                             | 23                            | 50                              | 63                          | 90                                 | 120                                | 176                                 |
| NWP117                | Quibdo117          | 11/2001                        |                              | ICNI                            | AKA                             | ICNI/AKA                          | 98           | 201                     | 133                       | 106                       | 174                        | 156                        | 4                             | 30                            | 48                              | 69                          | 88                                 | 139                                | 172                                 |
| NWP118                | Quibdo118          | 08/2001                        |                              | ICNI                            | GKA                             | ICNI/GKA                          | 98           | 201                     | 121                       | 110                       | 162                        | 159                        | 4                             | 23                            | 35                              | 63                          | 81                                 | 117                                | 149                                 |
| NWP119                | Quibdo119          | 04/2001                        |                              | ICNI                            | AKA                             | ICNI/AKA                          |              |                         | 129                       | 106                       | 159                        | 183                        |                               | 29                            | 32                              |                             |                                    | 135                                |                                     |
| NWP120                | Quibdo120          | 08/2006                        |                              | ICNI                            | AKA                             | ICNI/AKA                          | 98           | 201                     | 121                       | 110                       | 174                        | 149                        | 4                             | 23                            | 47                              | 63                          | 87                                 | 119                                | 166                                 |
| NWP121                | Quibdo121          | 08/2001                        |                              | ICNI                            | GKA                             | ICNI/GKA                          | 98           | 201                     |                           |                           | 171                        | 149                        | 4                             |                               | 43                              |                             | 84                                 |                                    |                                     |
| NWP122                | Quibdo122          | 11/2001                        |                              | ICNI                            | AKA                             | ICNI/AKA                          | 98           | 201                     | 129                       | 106                       | 162                        | 162                        | 4                             | 29                            | 36                              | 68                          | 82                                 | 136                                | 155                                 |
| NWP123                | Quibdo123          | 06/2001                        |                              | ICNI                            | GKA                             | ICNI/GKA                          | 98           | 201                     | 111                       | 110                       | 162                        | 159                        | 4                             | 16                            | 35                              | 58                          | 81                                 | 107                                | 146                                 |
| NWP124                | Quibdo124          | 08/2001                        |                              | ICNI                            | GKA                             | ICNI/GKA                          | 98           |                         | 121                       | 110                       | 162                        | 159                        |                               | 23                            | 35                              |                             |                                    | 117                                |                                     |
| NWP125                | Quibdo125          | 08/2001                        |                              | ICNI                            | GKA                             | ICNI/GKA                          |              |                         | 117                       |                           | 168                        | 152                        |                               |                               | 41                              |                             |                                    |                                    |                                     |
| NWP126                | Quibdo126          | 04/2001                        |                              | ICNI                            | GKA                             | ICNI/GKA                          |              |                         | 111                       |                           | 162                        |                            |                               |                               |                                 |                             |                                    |                                    |                                     |
| NWP127                | Quibdo127          | 04/2001                        |                              |                                 |                                 |                                   |              |                         |                           | 106                       | 159                        |                            |                               |                               |                                 |                             |                                    |                                    |                                     |
| NWP128                | Quibdo128          | 08/2001                        |                              | ICNI                            | GKA                             | ICNI/GKA                          | 98           | 201                     | 113                       | 108                       | 162                        | 159                        | 4                             | 18                            | 35                              | 59                          | 81                                 | 108                                | 147                                 |
| NWP129                | Quibdo129          | 03/2001                        |                              | NCNI                            | AKA                             | NCNI/AKA                          | 98           | 201                     | 107                       | 106                       |                            |                            | 4                             | 13                            |                                 | 55                          |                                    |                                    |                                     |
| NWP130                | Quibdo130          | 03/2001                        |                              | ICNI                            | GKA                             | ICNI/GKA                          | 98           |                         | 111                       | 108                       | 162                        | 162                        |                               | 15                            | 36                              |                             |                                    | 105                                |                                     |
| NWP131                | Quibdo131          | 08/2001                        |                              | ICNI                            | GKA                             | ICNI/GKA                          | 96           | 201                     | 121                       | 110                       | 162                        | 156                        | 2                             | 23                            | 34                              | 53                          | 78                                 | 116                                | 143                                 |
| NWP132                | Quibdo132          | 03/2007                        |                              | ICNI                            | GKA                             | ICNI/GKA                          | 98           | 201                     | 123                       | 110                       | 174                        | 149                        | 4                             | 27                            | 47                              | 66                          | 87                                 | 128                                | 168                                 |
| NWP133                | Quibdo133          | 08/2001                        |                              | ICNI                            | AKA                             | ICNI/AKA                          | 98           | 201                     | 129                       | 106                       | 174                        | 159                        | 4                             | 29                            | 49                              | 68                          | 89                                 | 138                                | 175                                 |

| RegionID <sup>1</sup> | LocID <sup>2</sup> | DATE <sup>3</sup><br>(mm YYYY) | Bolivian Repeat <sup>4</sup> | <i>dhfr</i> allele <sup>5</sup> | <i>dhps</i> allele <sup>6</sup> | Resistance genotypes <sup>7</sup> | <i>mDHFR</i> <sup>8</sup> | <i>MAI</i> <sup>9</sup> | <i>m0.8</i> <sup>10</sup> | <i>m4.3</i> <sup>11</sup> | <i>PfPK2</i> <sup>12</sup> | <i>Polyα</i> <sup>13</sup> | <i>msFR_Hap</i> <sup>14</sup> | <i>msPS_Hap</i> <sup>15</sup> | <i>msUnlinked</i> <sup>16</sup> | <i>msFRPS</i> <sup>17</sup> | <i>msFR_Unlinked</i> <sup>18</sup> | <i>msPS-unlinked</i> <sup>19</sup> | <i>msFRPSUnlinked</i> <sup>20</sup> |
|-----------------------|--------------------|--------------------------------|------------------------------|---------------------------------|---------------------------------|-----------------------------------|---------------------------|-------------------------|---------------------------|---------------------------|----------------------------|----------------------------|-------------------------------|-------------------------------|---------------------------------|-----------------------------|------------------------------------|------------------------------------|-------------------------------------|
| NWP134                | Quibdo134          | 05/2007                        |                              | NCNI                            | <b>GKA</b>                      | NCNI/GKA                          | 98                        | 201                     | 123                       | 110                       | 174                        | 149                        | 4                             | 27                            | 47                              | 66                          | 87                                 | 128                                | 168                                 |
| NWP135                | Quibdo135          | 08/2006                        |                              | ICNI                            | <b>GKA</b>                      | ICNI/GKA                          | 98                        | 201                     | 111                       | 108                       | 162                        | 162                        | 4                             | 15                            | 36                              | 57                          | 82                                 | 105                                | 152                                 |
| NWP136                | Quibdo136          | 09/2006                        |                              | ICNI                            | <b>GKA</b>                      | ICNI/GKA                          | 98                        | 201                     | 129                       | 106                       | 174                        | 149                        | 4                             | 29                            | 47                              | 68                          | 87                                 | 137                                | 169                                 |
| NWP137                | Quibdo137          | 04/2006                        |                              | ICNI                            | <b>AKA</b>                      | ICNI/AKA                          | 98                        | 201                     | 123                       | 106                       | 174                        | 159                        | 4                             | 25                            | 49                              | 64                          | 89                                 | 125                                | 173                                 |
| NWP138                | Quibdo138          | 10/2006                        |                              | ICNI                            | <b>AKA</b>                      | ICNI/AKA                          |                           |                         |                           | 104                       | 168                        | 162                        |                               |                               | 42                              |                             |                                    |                                    |                                     |
| NWP140                | Quibdo140          | 10/2006                        |                              | ICNI                            | <b>AKA</b>                      | ICNI/AKA                          | 98                        | 201                     | 129                       | 106                       | 174                        | 149                        | 4                             | 29                            | 47                              | 68                          | 87                                 | 137                                | 169                                 |
| NWP139                | Quibdo139          | 10/2006                        |                              | ICNI                            | <b>GKA</b>                      | ICNI/GKA                          | 98                        | 201                     | 111                       | 108                       | 162                        | 149                        | 4                             | 15                            | 33                              | 57                          | 80                                 | 103                                | 142                                 |
| NWP141                | Quibdo141          | 11/2006                        |                              | ICNI                            | <b>AKA</b>                      | ICNI/AKA                          | 98                        | 201                     | 111                       | 108                       | 162                        | 149                        | 4                             | 15                            | 33                              | 57                          | 80                                 | 103                                | 142                                 |
| NWP142                | Quibdo142          | 11/2006                        |                              | ICNI                            | <b>GKA</b>                      | ICNI/GKA                          | 98                        | 201                     | 111                       | 108                       | 162                        | 149                        | 4                             | 15                            | 33                              | 57                          | 80                                 | 103                                | 142                                 |
| NWP143                | Quibdo143          | 11/2006                        |                              | ICNI                            | <b>GKA</b>                      | ICNI/GKA                          | 98                        | 201                     | 123                       | 106                       | 165                        | 159                        | 4                             | 25                            | 38                              | 64                          | 83                                 | 123                                | 158                                 |
| NWP144                | Quibdo144          | 05/2006                        |                              | ICNI                            | <b>GKA</b>                      | ICNI/GKA                          | 98                        | 201                     | 111                       | 108                       | 174                        | 156                        | 4                             | 15                            | 48                              | 57                          | 88                                 | 106                                | 171                                 |
| <b>NWP145</b>         | Quibdo145          | 08/2006                        | NO                           | ICNI                            | <b>GKA</b>                      | ICNI/GKA                          | 98                        | 201                     | 111                       | 108                       | 162                        | 159                        | 4                             | 15                            | 35                              | 57                          | 81                                 | 104                                | 145                                 |
| NWP146                | Quibdo146          | 08/2006                        |                              | ICNI                            | <b>GKA</b>                      | ICNI/GKA                          | 98                        | 201                     | 111                       | 108                       | 174                        | 156                        | 4                             | 15                            | 48                              | 57                          | 88                                 | 106                                | 171                                 |

<sup>1</sup>Region ID: Region identification number; <sup>2</sup>LocID: Locality identification number; <sup>3</sup>Date of sample collection; <sup>4</sup>Presence or absence of the Bolivian Repeat (for sequenced samples); <sup>5</sup>*dhfr* allele (positions 51,59, 108, 164), sequenced samples (in bold) are wild type at position 50 (i.e. Cysteine) except for 2 samples from Amazonas (Amazonas3 and 5) that bear the R substitution as indicated; <sup>6</sup>*dhps* allele (positions 437, 540, 581); <sup>7</sup>combined *dhfr/dhps* resistance genotype; <sup>8</sup>*dhfr*-linked *mDHFR* microsatellite allele size (bp); <sup>9</sup>*dhfr*-linked *MAI* microsatellite allele size (bp); <sup>10</sup>*dhps*-linked *m0.8* microsatellite allele size (bp); <sup>11</sup>*dhps*-linked *m4.3* microsatellite allele size (bp); <sup>12</sup>*PfPK2* unlinked microsatellite allele size (bp); <sup>13</sup>*Polyα* unlinked microsatellite allele size (bp); <sup>14</sup>*dhfr*-linked (*mDHFR*, *MAI*) microsatellite haplotype code; <sup>15</sup>*dhps*-linked (*m0.8*, *m4.3*) microsatellite haplotype code; <sup>16</sup>unlinked (*PfPK2*, *Polyα*) multilocus association genotype code; <sup>17</sup>*dhfr* and *dhps*-linked multilocus association genotype code; <sup>18</sup>*dhfr*-linked and unlinked microsatellites multilocus association genotype; <sup>19</sup>*dhps*-linked and unlinked microsatellites multilocus association genotype code; <sup>20</sup>complete microsatellites multilocus association genotype code. In bold are sequenced samples. NWP: North West Pacific; SWP: South West Pacific.

**SUPPLEMENTARY TABLE S2**

| <b>Allele frequencies before 2006</b> |          |         |                  |                  | <b>Allele frequencies after 2006</b> |          |         |                  |                  |
|---------------------------------------|----------|---------|------------------|------------------|--------------------------------------|----------|---------|------------------|------------------|
| Locus                                 |          |         |                  |                  | Locus                                |          |         |                  |                  |
| <i>dhfr</i>                           | Amazonas | Orinoco | NWP <sup>1</sup> | SWP <sup>2</sup> | <i>dhfr</i>                          | Amazonas | Orinoco | NWP <sup>1</sup> | SWP <sup>2</sup> |
| <u>NCSI</u>                           | 0.00     | 0.00    | 0.00             | 61.90            | <u>NCSI</u>                          | 0.00     | 0.00    | 0.00             | 66.67            |
| <u>NCNI</u>                           | 12.50    | 4.55    | 7.14             | 28.57            | <u>NCNI</u>                          | 26.92    | 5.88    | 6.67             | 33.33            |
| <u>ICNI</u>                           | 6.25     | 95.45   | 92.86            | 9.52             | <u>ICNI</u>                          | 73.08    | 94.12   | 93.33            | 0.00             |
| <u>ICNL</u>                           | 81.25    | 0.00    | 0.00             | 0.00             | <u>ICNL</u>                          | 0.00     | 0.00    | 0.00             | 0.00             |
| <i>dhps</i>                           |          |         |                  |                  | <i>dhps</i>                          |          |         |                  |                  |
| <u>AKA</u>                            | 11.76    | 5.26    | 35.71            | 100.00           | <u>AKA</u>                           | 30.77    | 0.00    | 33.33            | 100.00           |
| <u>GKA</u>                            | 5.88     | 84.21   | 64.29            | 0.00             | <u>GKA</u>                           | 11.54    | 88.24   | 66.67            | 0.00             |
| <u>GKG</u>                            | 35.29    | 5.26    | 0.00             | 0.00             | <u>GKG</u>                           | 0.00     | 11.76   | 0.00             | 0.00             |
| <u>GEG</u>                            | 47.06    | 5.26    | 0.00             | 0.00             | <u>GEG</u>                           | 57.69    | 0.00    | 0.00             | 0.00             |

Allele frequencies for the different *dhfr* and *dhps* alleles (see text) before and after 2006. <sup>1</sup>Northwest Pacific. <sup>2</sup>Southwest Pacific.

**SUPPLEMENTARY TABLE S3.** Shared resistance genotypes, haplotypes, and multilocus association genotypes

|                                                                 | Amazonas | Orinoco              | NW Pacific <sup>b</sup> | SW Pacific <sup>c</sup> |
|-----------------------------------------------------------------|----------|----------------------|-------------------------|-------------------------|
| Resistance genotypes <sup>a</sup>                               | ICNI/GEG | ICNI/GEG<br>NCNI/GKA | NCNI/GKA                |                         |
|                                                                 | ICNI/GKA | ICNI/GKA             | ICNI/GKA                |                         |
|                                                                 | NCNI/AKA |                      | ICNI/AKA                | ICNI/AKA                |
|                                                                 | ICNI/AKA | ICNI/AKA             | ICNI/AKA                | ICNI/AKA                |
| <i>dhfr</i> -linked microsatellite haplotype <sup>d</sup>       | 4        | 4                    | 4                       | 4                       |
| <i>dhps</i> -linked microsatellite haplotype <sup>e</sup>       | 21<br>19 | 21<br>19             | 29<br>25                | 29<br>25                |
|                                                                 | 27       | 27<br>23<br>30<br>15 | 27<br>23<br>30<br>15    | 23                      |
| <i>Polya/PfPK2</i> microsatellite association <sup>f</sup>      | 39<br>46 | 39<br>46             | 43<br>47                | 43<br>47                |
|                                                                 |          | 36<br>38<br>48<br>49 | 36<br>38<br>48<br>49    |                         |
|                                                                 | 35       | 35                   | 35                      | 35                      |
| <i>dhfr/dhps</i> linked microsatellite association <sup>g</sup> | 60<br>61 | 60<br>61             |                         |                         |

|                                                                      |     |     |     |     |
|----------------------------------------------------------------------|-----|-----|-----|-----|
|                                                                      |     |     | 64  | 64  |
|                                                                      |     |     | 68  | 68  |
|                                                                      | 66  | 66  | 66  |     |
|                                                                      |     | 63  | 63  | 63  |
|                                                                      |     | 57  | 57  |     |
|                                                                      |     | 69  | 69  |     |
| <hr/>                                                                |     |     |     |     |
| <i>dhfr</i> -linked/Unlinked microsatellite association <sup>h</sup> | 86  | 86  |     |     |
|                                                                      |     |     | 87  | 87  |
|                                                                      |     | 82  | 82  |     |
|                                                                      |     | 88  | 88  |     |
|                                                                      |     | 89  | 89  |     |
|                                                                      | 81  | 81  | 81  | 81  |
| <hr/>                                                                |     |     |     |     |
| <i>dhfr</i> -linked/Unlinked microsatellite association <sup>i</sup> | 86  | 86  |     |     |
|                                                                      |     |     | 87  | 87  |
|                                                                      |     | 82  | 82  |     |
|                                                                      |     | 88  | 88  |     |
|                                                                      |     | 89  | 89  |     |
|                                                                      | 81  | 81  | 81  | 81  |
| <hr/>                                                                |     |     |     |     |
| Complete multilocus association <sup>j</sup>                         | 151 | 151 |     |     |
|                                                                      | 163 | 163 |     |     |
|                                                                      |     |     | 169 | 169 |
|                                                                      |     | 145 | 145 |     |
|                                                                      |     | 149 | 149 |     |
|                                                                      |     | 172 | 172 |     |
| <hr/>                                                                |     |     |     |     |

<sup>a</sup>The combination of *dhfr/dhps* alleles; <sup>b</sup>North West Pacific; <sup>c</sup>South West Pacific; <sup>d</sup>*dhfr*-linked microsatellites (*mDHFR* and *MAI*) haplotype;

<sup>e</sup>*dhps*-linked microsatellites (*m0.8* and *m4.31*) haplotype; <sup>f</sup>*PfPK2* and *Polyα* microsatellite multilocus association genotype; <sup>g</sup>*dhfr*-linked



(*mDHFR* and *MAI*) and *dhps*-linked (*m0.8* and *m4.31*) microsatellite multilocus association genotype; <sup>h</sup>*dhfr*-linked (*mDHFR* and *MAI*) and unlinked (*PfPK2* and *Polyα*) multilocus association genotype; <sup>j</sup>complete microsatellite multilocus association genotype (*mDHFR*, *MAI*, *m0.8*, *m4.3*, *PfPK2* and *Polyα*). Numbers relate to microsatellite haplotypes and multilocus association genotypes coded as in supplementary table S1.

**Supplementary Table S4.** Genetic diversity (expected heterozygosity) at the *dhfr* and *dhps*, *dhfr* (*mDHFR*, *MAI*)- and *dhps* (*m0.8*, *m4.3*)-linked microsatellites and neutral unlinked (*PfPK2*, *Polyα*) microsatellite loci.

| Locus        | Amazonas | Orinoco | NWP <sup>1</sup> | SWP <sup>2</sup> |
|--------------|----------|---------|------------------|------------------|
| <i>dhfr</i>  | 0.647    | 0.102   | 0.133            | 0.522            |
| <i>dhps</i>  | 0.647    | 0.264   | 0.468            | 0                |
| <i>mDHFR</i> | 0.623    | 0.380   | 0.08             | 0.495            |
| <i>MAI</i>   | 0.539    | 0.211   | 0                | 0.680            |
| <i>m0.8</i>  | 0.224    | 0.816   | 0.809            | 0.611            |
| <i>m4.3</i>  | 0.184    | 0.746   | 0.709            | 0.545            |
| <i>PfPk2</i> | 0.611    | 0.667   | 0.692            | 0.547            |
| <i>Polyα</i> | 0.482    | 0.417   | 0.783            | 0.591            |

<sup>1</sup>North West Pacific (Quibdo), <sup>2</sup>South West Pacific (Tumaco).
